# Supplementary material for: A minor metabolite fromCurcuma longaeffective against metabolic syndrome: results from a randomized, double-blind, placebo-controlled clinical study
Source: Royal Society of Chemistry journal article supplement (doi:10.1039/d2fo03627d), 2023-01-01
Supplement: d2fo03627d1.pdf [file d2fo03627d1.pdf]

**Title:**

**A Minor Metabolite from *Curcuma longa* Effective for Metabolic Syndrome: Results from a Randomized, Double-blind, Placebo-Controlled Clinical Study**

**Author Names and Affiliations:**

**Muhammed Majeed<sup>1,2</sup>, Kalyanam Nagabhushanam<sup>2</sup>, T V Devarajan<sup>3</sup>, Santhosh Saklecha<sup>4</sup>, S. Venkata Krishna Reddy<sup>5</sup>, Lakshmi Mundkur<sup>1\*</sup>**

<sup>1</sup>Sami-Sabinsa Group Limited, 19/1&19/2, I Main, II Phase, Peenya Industrial Area, Bengaluru, Karnataka 560058, India

<sup>2</sup>Sabinsa Corporation, 20 Lake Drive, East Windsor, NJ 08520, USA

<sup>3</sup>Apollo First Med Hospitals, 154, Poonamallee High Rd, Kilpauk, Chennai, Tamil Nadu 600010, India

<sup>4</sup>Santosh Hospital, 6, 1, Promenade Rd, Coles Park Pulikeshi Nagar, Bengaluru, Karnataka 560005, India

<sup>5</sup>Vijaya Super Specialty Hospital, 41-A, 16 II, Raghava Cine Complex Rd, Pogathota, Nellore, Andhra Pradesh 524001, India

## Supplementary Methods

### Inclusion and exclusion criteria

The inclusion criteria were as follows:

1.) IDF (International Diabetes Federation) 2006:

Waist  $\geq 90$  cm (men) or  $\geq 80$  cm (women) along with the presence of a minimum of two or more of the following:

- a.) Fasting blood glucose greater than or equal to 5.6 mmol/L (100 mg/dl) or diagnosed diabetes
  - b.) HDL cholesterol  $< 1.0$  mmol/L (40 mg/dl) in men,  $< 1.3$  mmol/L (50 mg/dl) in women, or drug treatment for low HDL-C
  - c.) Blood triglycerides  $> 1.7$  mmol/L (150 mg/dl) or drug treatment for elevated triglycerides
  - d.) Blood pressure  $> 130/85$  mmHg or drug treatment for previously diagnosed hypertension.
- 2.) Male and/or female subjects aged between 30 to 65 years (both inclusive).
- 3.) BMI ( $\geq$ ) greater than or equal to 28 kg/m<sup>2</sup> and less than or equal to ( $\leq$ ) 35 kg/m<sup>2</sup>.
- 4.) Willing to take up regular physical activity (for example: walking for 30 minutes daily for 5 days a week).
5. Subjects willing to agree to blood draws as per the protocol.
6. Able to give written informed consent.
- 7.) Willing to come for regular follow-up visits.

#### 1.1.1. Exclusion criteria

The exclusion criteria were as follow:

- 1.) Intake of prescribed drugs in Ayurveda, Homeopathy, Naturopathy, Allopathy, etc., or prior surgery for obesity in the previous six months.
- 2.) Pathophysiologic/genetic syndromes associated with obesity (Cushing's syndrome, Turner's syndrome, Prader-Willi syndrome).
- 3.) Subjects who disagree to avoid drinking alcohol during the study period.
- 4.) Subjects with a diagnostic history of malignancy.
- 5.) Fasting Blood Glucose  $\geq 150$  mg/dl and HbA1c  $> 7\%$ .
- 6.) Subjects with a history of clinically diagnosed Hypertension and with BP  $> 160 / 100$  mm of Hg.
- 7.) Subjects diagnosed with thyroid disease, on medications for an underactive or overactive thyroid, and with TSH  $> 6$  mIU/L.
- 8.) Subjects on lipid-lowering drugs.

- 9.) Subjects having a history of underlying Inflammatory arthropathy, Septic arthritis, Inflammatory joint disease, Gout, Pseudo gout, Paget's disease, Joint fracture, Acromegaly, Fibromyalgia, Wilsons disease, Ochronosis, Hemochromatosis, Heritable arthritic disorder or Collagen gene mutations or Rheumatoid arthritis.
- 10.) Subjects having a history of Coagulopathies, Cardiovascular diseases, Congestive heart failure, Pancreatitis, Lactic acidosis, Hepatomegaly with steatosis, Motor weakness, Peripheral sensory neuropathy, Psychiatric disorder, Severe Pulmonary Dysfunction (uncontrolled Bronchial Asthma and/or Chronic Obstructive Pulmonary Disorder [COPD]).
- 11.) Have been diagnosed with an eating disorder, such as Anorexia nervosa, bulimia nervosa, Binge eating disorder, or Nocturnal eating disorder.
- 12.) History of any psychiatric disorders like Schizophrenia or bipolar disorder.
- 13.) Weight loss (-5%) in the last 3 months.
- 14.) Subjects on prolonged (> 4 weeks) medication with corticosteroids, antidepressants, anticholinergics, etc., or any other drugs that may influence the outcome of the study.
- 15.) Subjects with a concurrent serious hepatic disorder (defined as Aspartate Amino Transferase (AST) and/or Alanine Amino Transferase (ALT), Total Bilirubin, Alkaline Phosphatase (ALP)>2 times the upper normal limit) or Renal Disorders (defined as S. Creatinine>1.2mg/dL for females or >1.4 mg/dL for males and EGFR of 60 or less).
- 16.) History of hypersensitivity to any of the herbal extracts or dietary supplements.
- 17.) Pregnant / lactating woman.
- 18.) Subjects who have completed participation in any other clinical trial during the last six months.
- 19.) Any other condition that the Principal Investigator thinks may jeopardize the study.

### **Sample Size Determination:**

We used an earlier research publication for the sample size calculations<sup>1</sup>. As per research publication, baseline values of Body Weight (kg) measured at baseline were:

Placebo Group baseline – Total Body weight mean=76.9, SD=11.08

Curcuma Caesia (Calebin A) Group baseline – Total Body weight mean=90.13, SD=14.75

We chose to mean=83.51 and SD=12.92 as being towards the centre of the two baseline results.

An SD=12.92 with mean=83.51 means the SD is about 0.2 times (base correlation) the size of the mean. That is, the coefficient of variation (CV) is 0. The mean Body weight value in the study is 83.51 and we assume the standard deviation is 12.92.

Using these inputs with 80% power and alpha=0.05 significance level assuming correlation of 0.2, the required total sample size is 60 for evaluation.

Allowing for 20% drop-out rate, the required sample size for recruitment is total of 72 in 1:1 ratio between two treatment groups (i.e., 36 per treatment group). We recruited 100 participants in a 1:1 ratio between two treatment groups (N=50 per treatment group)

## **Anthropometric measurements**

### **Body weight measurements**

Weighing balance of same make and model was provided by the sponsor to each site. All the sites were bound to use the same for recording weight. Body weight measurement of the participants were taken in a surgical gown without footwear and other external apparel. Body Mass Index (BMI) is calculated by formula:  $BMI = \frac{kg}{m^2}$ , where; kg = person's weight in kilograms and  $m^2$  = height in meters squared.

### **Waist and hip Circumference measurement**

The measuring tape was placed horizontally around the waist just above the hip bone. The waist circumference was measured after breathing out.

To measure hip circumference, the outer garments, were removed, and the soft measuring tape was wrapped straight around the widest part of hips with feet put together. Hip circumference is the point at which the end of the tape meets the remaining length.

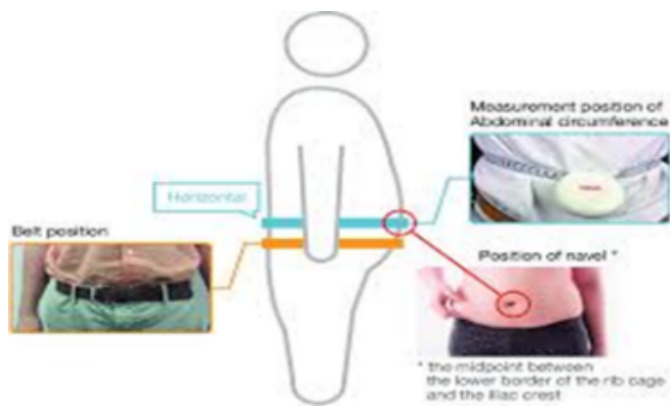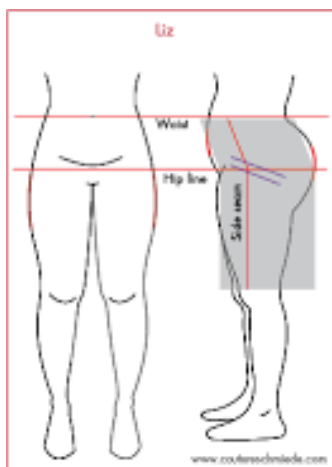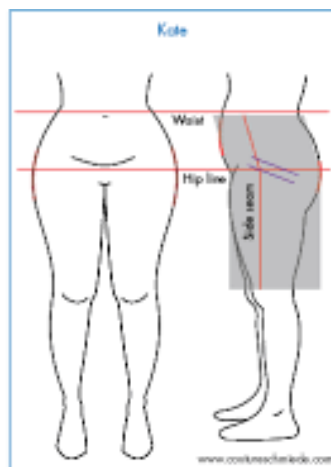

## Laboratory measurements

| Test Name                         | Age   | Gender | Reference Ranges | CH     | CL    | Unit          | Instrument     | METHODOLOGY                                    |
|-----------------------------------|-------|--------|------------------|--------|-------|---------------|----------------|------------------------------------------------|
| WHITE BLOOD CELL COUNT            | 18-99 | M/F    | 4.0 - 10.0       | > 30.0 | < 2.0 | thou/ $\mu$ L | UNICEL DXH 600 | COUNTER PRINCIPLE                              |
| RED BLOOD CELLS                   | 18-99 | F      | 3.8 - 4.8        | NA     | NA    | mil/ $\mu$ L  | UNICEL DXH 600 | COUNTER PRINCIPLE                              |
|                                   |       | M      | 4.5 - 5.5        | NA     | NA    |               |                |                                                |
| HEMAGLOBIN                        | 18-99 | M      | 13.0 - 17.0      | > 20.0 | < 6.0 | g/dL          | UNICEL DXH 600 | PHOTOMETRIC MEASUREMENT, CYANMETHEMOGLOBIN MET |
|                                   |       | F      | 12.0 - 15.0      | > 18.0 | < 6.0 |               |                |                                                |
| MCV                               | 18-99 | M/F    | 83.0-101.0       | 101    | 23    | fL            | UNICEL DXH 600 | DERIVED PARAMETER FROM RBC PARAMETER           |
| MCH                               | 18-99 | M/F    | 27.0-32.0        | 32     | 27    | pg            | UNICEL DXH 600 | CALCULATED PARAMETER                           |
| MCHC                              | 18-99 | M/F    | 31.5-34.5        | 34.5   | 31.5  | g/dL          | UNICEL DXH 600 | CALCULATED PARAMETER                           |
| PLATELET COUNT                    | 18-99 | M/F    | 150 - 410        | > 700  | < 50  | thou/ $\mu$ L | UNICEL DXH 600 | ELECTRONIC IMPEDENCE & MICROSCOPY              |
| HEMATOCRIT (PCV)                  | 18-99 | F      | 36 - 46          | NA     | NA    | %             | UNICEL DXH 600 | Calculated Parameter                           |
|                                   |       | M      | 40 - 50          | NA     | NA    |               |                |                                                |
| NEUTROPHILS (%)                   | 18-99 | M/F    | 40 - 80          | NA     | NA    | %             | UNICEL DXH 600 | VCS TECHNOLOGY/ MICROSCOPY                     |
| LYMPHOCYTES (%)                   | 18-99 | M/F    | 20 - 40          | NA     | NA    | %             | UNICEL DXH 600 | VCS TECHNOLOGY/ MICROSCOPY                     |
| MONOCYTES (%)                     | 18-99 | M/F    | 2-10             | NA     | NA    | %             | UNICEL DXH 600 | VCS TECHNOLOGY/ MICROSCOPY                     |
| EOSINOPHILS (%)                   | 18-99 | M/F    | 1-6              | NA     | NA    | %             | UNICEL DXH 600 | VCS TECHNOLOGY/ MICROSCOPY                     |
| BASOPHILS (%)                     | 18-99 | M/F    | < 1 - 2          | NA     | NA    | %             | UNICEL DXH 600 | VCS TECHNOLOGY/ MICROSCOPY                     |
| MEAN PLATELET VOLUME (MPV)        | 18-99 | M/F    | 6.8-10.9         | 10.9   | 6.8   | fL            | UNICEL DXH 600 | DERIVED PARAMETER FROM PLATELET HISTOGRAM      |
| RED CELL DISTRIBUTION WIDTH (RDW) | 18-99 | M/F    | 11.6-14.0        | 14     | 11.6  | %             | UNICEL DXH 600 | DERIVED PARAMETER FROM RBC HISTOGRAM           |

Verified by



Dr. Reena Mittal

Senior Consultant - Haematopathologist, Haematology & Flow Cytometry

Approved by



Dr. Simi Bhatia

Director - Goregaon Reference Lab., Senior histopathologist,  
Head Auto-immune section

| Test Name              | Age               | Gender | Reference Ranges                                                                                            | CH  | CL  | Unit          | Instrument              | Methodology                                                                             |
|------------------------|-------------------|--------|-------------------------------------------------------------------------------------------------------------|-----|-----|---------------|-------------------------|-----------------------------------------------------------------------------------------|
| TRIGLYCERIDES          | 0 - 99            | M/F    | <150 (NORMAL)<br>150-199 (BORDERLINE HIGH)<br>200-499 (HIGH)<br>>=500 (VERY HIGH)                           | NA  | NA  | mg/dL         | COBAS 8000              | Spectrophotometry, enzymatic<br>Endpoint with glycerol blank                            |
| CHOLESTEROL TOTAL      | 0 - 99            | M/F    | < 200 (DESIRABLE)<br>200 - 239 (BORDERLINE HIGH)<br>>= 240 (HIGH)                                           | NA  | NA  | mg/dL         | COBAS 8000              | Spectrophotometry, Enzymatic<br>Colorimetric Cholesterol Oxidase<br>Esterase Peroxidase |
| Cholesterol,HDL        | 0 - 99            | M/F    | < 40 (LOW HDL CHOLESTEROL)<br>>= 60 (HIGH HDL CHOLESTEROL)                                                  | NA  | NA  | mg/dL         | COBAS 8000              | Spectrophotometry, Homogenous<br>Direct Enzymatic Colorimetric                          |
| Cholesterol,LDL Direct | 0 - 99            | M/F    | <100 OPTIMAL<br>100-125 NEAR OR ABOVE OPTIMAL<br>130-159 BORDERLINE HIGH<br>160-189 HIGH<br>>=190 VERY HIGH | NA  | NA  | mg/dL         | COBAS 8000              | Spectrophotometry,<br>Homogeneous Enzymatic<br>Colorimetric                             |
| VLD. (Calculated)      | 0 - 99            | M/F    | <= 30                                                                                                       | NA  | NA  | mg/dL         | COBAS 8000              | Calculated Parameter                                                                    |
| SODIUM                 | 1 year - 18 year  | M/F    | 138 - 145                                                                                                   | 160 | 120 | mmol/L        | COBAS 8000              | ISE indirect                                                                            |
|                        | 18 year - 99 year | M/F    | 136 - 145                                                                                                   | 160 | 120 |               |                         |                                                                                         |
| POTASSIUM              | 1 year - 18 year  | M/F    | 3.4 - 4.7                                                                                                   | 6.2 | 2.8 | mmol/L        | COBAS 8000              | ISE indirect                                                                            |
|                        | 18 year - 99 year | M/F    | 3.5 - 5.1                                                                                                   | 6.2 | 2.8 |               |                         |                                                                                         |
| Chloride               | 0 days - 28 days  | M/F    | 97 - 110                                                                                                    | 120 | 90  | mmol/L        | COBAS 8000              | ISE indirect                                                                            |
|                        | 28 days - 99 year |        | 98 - 106                                                                                                    |     |     |               |                         |                                                                                         |
| EGFR                   | 18-99             | M/F    | > 60                                                                                                        | NA  | NA  | ml/min/1.73m2 | COBAS 8000              | Calculated Parameter                                                                    |
| Hs-CRP                 | 18 year - 99 year | M/F    | Low risk for CAD:<br>< 1.00<br>Average risk for CAD:<br>1.00 - 3.00<br>High risk for CAD:<br>> 3.00         | NA  | NA  | mg/L          | BEHRING NEPHELOMETER II | Nephelometry, Particle-Enhanced<br>Immunoturbidimetry                                   |

Verified by  
  
 Dr. Kshama Dimpalgaonkar  
 Head Dept. of Biochemistry

Approved by  
  
 Dr. Simi Bhatia  
 Director - Goregaon Reference Lab., Senior histopathologist,  
 Head Auto-immune section

| Test Name              | Age               | Gender | Reference Ranges                                                                                            | CH  | CL  | Unit                      | Instrument               | Methodology                                                                              |
|------------------------|-------------------|--------|-------------------------------------------------------------------------------------------------------------|-----|-----|---------------------------|--------------------------|------------------------------------------------------------------------------------------|
| TRIGLYCERIDES          | 0 - 99            | M/F    | <150 (NORMAL)<br>150-199 (BORDERLINE HIGH)<br>200-499 (HIGH)<br>>=500 (VERY HIGH)                           | NA  | NA  | mg/dL                     | COBAS 8000               | Spectrophotometry, enzymatic<br>Endpoint with glycerol blank                             |
| CHOLESTEROL TOTAL      | 0 - 99            | M/F    | < 200 (DESIRABLE)<br>200 - 239 (BORDERLINE HIGH)<br>>= 240 (HIGH)                                           | NA  | NA  | mg/dL                     | COBAS 8000               | Spectrophotometry, Enzymatic-<br>Colorimetric Cholesterol Oxidase<br>Esterase Peroxidase |
| Cholesterol,HDL        | 0 - 99            | M/F    | < 40 (LOW HDL CHOLESTEROL)<br>>= 60 (HIGH HDL CHOLESTEROL)                                                  | NA  | NA  | mg/dL                     | COBAS 8000               | Spectrophotometry, Homogeneous<br>Direct Enzymatic Colorimetric                          |
| Cholesterol,LDL Direct | 0 - 99            | M/F    | <100 OPTIMAL<br>100-125 NEAR OR ABOVE OPTIMAL<br>130-159 BORDERLINE HIGH<br>160-189 HIGH<br>>=190 VERY HIGH | NA  | NA  | mg/dL                     | COBAS 8000               | Spectrophotometry,<br>Homogeneous Enzymatic<br>Colorimetric                              |
| VLDL (Calculated)      | 0 - 99            | M/F    | <= 30                                                                                                       | NA  | NA  | mg/dL                     | COBAS 8000               | Calculated Parameter                                                                     |
| SODIUM                 | 1 year - 18 year  | M/F    | 138 - 145                                                                                                   | 160 | 120 | mmol/L                    | COBAS 8000               | ISE indirect                                                                             |
|                        | 18 year - 99 year | M/F    | 136 - 145                                                                                                   | 160 | 120 |                           |                          |                                                                                          |
| POTASSIUM              | 1 year - 18 year  | M/F    | 3.4 - 4.7                                                                                                   | 6.2 | 2.8 | mmol/L                    | COBAS 8000               | ISE indirect                                                                             |
|                        | 18 year - 99 year | M/F    | 3.5 - 5.1                                                                                                   | 6.2 | 2.8 |                           |                          |                                                                                          |
| Chloride               | 0 days - 28 days  | M/F    | 97 - 110                                                                                                    | 120 | 80  | mmol/L                    | COBAS 8000               | ISE indirect                                                                             |
|                        | 28 days - 99 year |        | 98 - 106                                                                                                    |     |     |                           |                          |                                                                                          |
| EGFR                   | 18-99             | M/F    | > 60                                                                                                        | NA  | NA  | mL/min/1.73m <sup>2</sup> | COBAS 8000               | Calculated Parameter                                                                     |
| Hs-CRP                 | 18 year - 99 year | M/F    | Low risk for CAD:<br>< 1.00<br>Average risk for CAD:<br>1.00 - 3.00<br>High risk for CAD:<br>> 3.00         | NA  | NA  | mg/L                      | BEHRING NEPHELOMETTER II | Nephelometry, Particle- Enhanced<br>Immunonephelometry                                   |

Verified by

Dr. Kshama Pimpalgaonkar  
Head Dept. of Biochemistry

Approved by

Dr. Simi Bhatia  
Director - Goregaon Reference Lab., Senior histopathologist,  
Head Auto-immune section



| Test Name                                                                                                   | Age                 | Gender | Reference Ranges                                                                                               | CH    | CL    | Unit   | Instrument | Methodology                                            |
|-------------------------------------------------------------------------------------------------------------|---------------------|--------|----------------------------------------------------------------------------------------------------------------|-------|-------|--------|------------|--------------------------------------------------------|
| T3                                                                                                          | 18 years-20 years   | M      | 91.0 - 218.0                                                                                                   | 218   | 91    | ng/dL  | COBAS 8000 | COMPETITIVE<br>ELECTROCHEM LUMINESCENCE<br>IMMUNOASSAY |
|                                                                                                             | > 20 years-99 years |        | 80.0 - 200.0                                                                                                   | 200   | 80    |        |            |                                                        |
|                                                                                                             | 18 years-20 years   | F      | Non-Pregnant Women<br>91.0 - 218.0                                                                             | 218   | 91    |        |            |                                                        |
|                                                                                                             |                     |        | Pregnant Women<br>1st Trimester:105.0 - 230.0<br>2nd Trimester:129.0 - 262.0<br>3rd Trimester:135.0 - 262.0    |       |       |        |            |                                                        |
|                                                                                                             |                     |        | Non-Pregnant Women<br>80.0 - 200.0                                                                             |       |       |        |            |                                                        |
|                                                                                                             | > 20 years-99 years | F      | Pregnant Women<br>1st Trimester:105.0 - 230.0<br>2nd Trimester:129.0 - 262.0<br>3rd Trimester:135.0 - 262.0    | 200   | 80    |        |            |                                                        |
| Non-Pregnant Women<br>80.0 - 200.0                                                                          |                     |        |                                                                                                                |       |       |        |            |                                                        |
| Pregnant Women<br>1st Trimester:105.0 - 230.0<br>2nd Trimester:129.0 - 262.0<br>3rd Trimester:135.0 - 262.0 |                     |        |                                                                                                                |       |       |        |            |                                                        |
| T4                                                                                                          | 18 years-20 years   | M      | 5.91 - 13.20                                                                                                   | 13.20 | 5.91  | µg/dL  | COBAS 8000 | COMPETITIVE<br>ELECTROCHEM LUMINESCENCE<br>IMMUNOASSAY |
|                                                                                                             | > 20 years-99 years |        | 5.10 - 14.10                                                                                                   | 14.10 | 5.10  |        |            |                                                        |
|                                                                                                             | 18 years-20 years   | F      | Non Pregnant Women<br>5.91 - 13.20                                                                             | 13.20 | 5.91  |        |            |                                                        |
|                                                                                                             |                     |        | Pregnant Women<br>1st Trimester: 7.93 - 14.80<br>2nd Trimester: 7.93 - 16.10<br>3rd Trimester: 6.95 - 15.70    |       |       |        |            |                                                        |
|                                                                                                             |                     |        | Non-Pregnant Women<br>5.10 - 14.10                                                                             |       |       |        |            |                                                        |
|                                                                                                             | > 20 years-99 years | F      | Pregnant Women<br>1st Trimester: 7.93 - 14.80<br>2nd Trimester: 7.93 - 16.10<br>3rd Trimester: 6.95 - 15.70    | 14.10 | 5.10  |        |            |                                                        |
| Non-Pregnant Women<br>5.10 - 14.10                                                                          |                     |        |                                                                                                                |       |       |        |            |                                                        |
| Pregnant Women<br>1st Trimester: 7.93 - 14.80<br>2nd Trimester: 7.93 - 16.10<br>3rd Trimester: 6.95 - 15.70 |                     |        |                                                                                                                |       |       |        |            |                                                        |
| TSH                                                                                                         | 18 years-20 years   | M      | 0.510 - 4.300                                                                                                  | 4.300 | 0.510 | µIU/mL | COBAS 8000 | SANDWICH<br>ELECTROCHEM LUMINESCENCE<br>IMMUNOASSAY    |
|                                                                                                             | > 20 years-99 years |        | 0.270 - 4.200                                                                                                  | 4.200 | 0.270 |        |            |                                                        |
|                                                                                                             | 18 years-20 years   | F      | Non Pregnant Women<br>0.510 - 4.300                                                                            | 4.300 | 0.510 |        |            |                                                        |
|                                                                                                             |                     |        | Pregnant Women<br>1st Trimester: 0.330 - 4.590<br>2nd Trimester: 0.350 - 4.100<br>3rd Trimester: 0.210 - 3.150 |       |       |        |            |                                                        |
|                                                                                                             |                     |        | Non Pregnant Women<br>0.27 - 4.20                                                                              |       |       |        |            |                                                        |
|                                                                                                             | > 20 years-99 years | F      | Pregnant Women<br>1st Trimester: 0.33 - 4.59<br>2nd Trimester: 0.35 - 4.10<br>3rd Trimester: 0.21 - 3.15       | 4.200 | 0.270 |        |            |                                                        |
| Non Pregnant Women<br>0.27 - 4.20                                                                           |                     |        |                                                                                                                |       |       |        |            |                                                        |
| Pregnant Women<br>1st Trimester: 0.33 - 4.59<br>2nd Trimester: 0.35 - 4.10<br>3rd Trimester: 0.21 - 3.15    |                     |        |                                                                                                                |       |       |        |            |                                                        |

Verified by

Dr. Khama Pimpalgaonkar  
Head Dept. of Biochemistry

*[Signature]*  
22/07/22

Approved by

Dr. Simi Bhatia  
Director - Goregaon Reference Lab, Senior histopathologist,  
Head Auto-Immune section

*[Signature]*

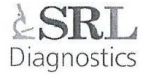

**SRL REFERENCE RANGE DOCUMENT -  
URINALYSIS**

SRL Ltd.  
Prime Square Building, Plot No  
1,  
Gaiwadi Industrial Estate, S.V.  
Road Goregaon (W)  
Mumbai - 400 062.

| Test Name        | Age   | Gender | Reference Ranges | CH   | CL | Unit | Instrument                          | Methodology                                                            |
|------------------|-------|--------|------------------|------|----|------|-------------------------------------|------------------------------------------------------------------------|
| Colour           | 18-99 | M/F    | -                | NA   | NA | -    | AVE 772 INTEGRATED AUTOMATED SYSTEM | Urine Routine & Microscopy Examination ny Integrated Automated System. |
| Appearance       | 18-99 | M/F    | -                | NA   | NA | -    | AVE 772 INTEGRATED AUTOMATED SYSTEM | Urine Routine & Microscopy Examination ny Integrated Automated System. |
| pH               | 18-99 | M/F    | 5.0 - 7.5        | NA   | NA | -    | AVE 772 INTEGRATED AUTOMATED SYSTEM | Urine Routine & Microscopy Examination ny Integrated Automated System. |
| Specific Gravity | 18-99 | M/F    | 1.010 - 1.030    | NA   | NA | -    | AVE 772 INTEGRATED AUTOMATED SYSTEM | Urine Routine & Microscopy Examination ny Integrated Automated System. |
| Glucose          | 18-99 | M/F    | Not Detected     | >+++ | NA | -    | AVE 772 INTEGRATED AUTOMATED SYSTEM | Urine Routine & Microscopy Examination ny Integrated Automated System. |
| Protein          | 18-99 | M/F    | Not Detected     | >+++ | NA | -    | AVE 772 INTEGRATED AUTOMATED SYSTEM | Urine Routine & Microscopy Examination ny Integrated Automated System. |
| Ketone           | 18-99 | M/F    | Not Detected     | >+++ | NA | -    | AVE 772 INTEGRATED AUTOMATED SYSTEM | Urine Routine & Microscopy Examination ny Integrated Automated System. |
| Blood            | 18-99 | M/F    | Not Detected     | >++  | NA | -    | AVE 772 INTEGRATED AUTOMATED SYSTEM | Urine Routine & Microscopy Examination ny Integrated Automated System. |
| Bilirubin        | 18-99 | M/F    | Not Detected     | >+++ | NA | -    | AVE 772 INTEGRATED AUTOMATED SYSTEM | Urine Routine & Microscopy Examination ny Integrated Automated System. |
| Urobilinogen     | 18-99 | M/F    | Normal           | NA   | NA | -    | AVE 772 INTEGRATED AUTOMATED SYSTEM | Urine Routine & Microscopy Examination ny Integrated Automated System. |

|                  |       |     |              |    |    |           |                                     |                                                                        |
|------------------|-------|-----|--------------|----|----|-----------|-------------------------------------|------------------------------------------------------------------------|
| Nitrite          | 18-99 | M/F | Not Detected | NA | NA | -         | AVE 772 INTEGRATED AUTOMATED SYSTEM | Urine Routine & Microscopy Examination ny Integrated Automated System. |
| Leukocytes       | 18-99 | M/F | Not Detected | NA | NA | -         | AVE 772 INTEGRATED AUTOMATED SYSTEM | Urine Routine & Microscopy Examination ny Integrated Automated System. |
| WBC (Pus cells)  | 18-99 | M/F | <5           | NA | NA | cells/hpf | AVE 772 INTEGRATED AUTOMATED SYSTEM | Urine Routine & Microscopy Examination ny Integrated Automated System. |
| Epithelial Cells | 18-99 | M/F | <5           | NA | NA | cells/hpf | AVE 772 INTEGRATED AUTOMATED SYSTEM | Urine Routine & Microscopy Examination ny Integrated Automated System. |
| RBC              | 18-99 | M/F | Not Detected | >+ | NA | cells/hpf | AVE 772 INTEGRATED AUTOMATED SYSTEM | Urine Routine & Microscopy Examination ny Integrated Automated System. |
| Casts            | 18-99 | M/F | Not Detected | >+ | NA | /lpf      | AVE 772 INTEGRATED AUTOMATED SYSTEM | Urine Routine & Microscopy Examination ny Integrated Automated System. |
| Crystal          | 18-99 | M/F | Not Detected | NA | NA | /hpf      | AVE 772 INTEGRATED AUTOMATED SYSTEM | Urine Routine & Microscopy Examination ny Integrated Automated System. |
| Yeast            | 18-99 | M/F | Not Detected | NA | NA | -         | AVE 772 INTEGRATED AUTOMATED SYSTEM | Urine Routine & Microscopy Examination ny Integrated Automated System. |
| Bacteria         | 18-99 | M/F | Not Detected | NA | NA | -         | AVE 772 INTEGRATED AUTOMATED SYSTEM | Urine Routine & Microscopy Examination ny Integrated Automated System. |

Verified by

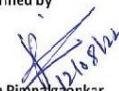  
Dr. Kshama Pimpalgaoonkar  
Head Dept. of Biochemistry

Approved by

  
Dr. Simi Bhatia  
Director - Goregaon Reference Lab., Senior histopathologist,  
Head Auto-immune section

| PARAMETER                         | ACTIVE (N=47) |              | PLACEBO (N=47) |              |
|-----------------------------------|---------------|--------------|----------------|--------------|
|                                   | Day 0         | Day90        | Day 0          | Day90        |
| <b>Liver Function Test</b>        |               |              |                |              |
| Total Bilirubin (mg/dL)           | 0.60±0.23     | 0.61±0.29    | 0.96±2.55      | 0.58±0.23    |
| Alkaline Phosphatase (IU/L)       | 113.63±45.44  | 114.21±43.89 | 117.06±41.12   | 113.67±41.78 |
| AST-SGOT (U/L)                    | 24.14±12.59   | 22.65±9.03   | 22.02±8.63     | 23.12±8.23   |
| ALT – SGPT (U/L)                  | 28.17±22.61   | 22.82±14.84  | 23.21±10.01    | 24.10±12.06  |
| <b>Renal Function Test</b>        |               |              |                |              |
| Serum Creatinine (mg/dL)          | 0.90±0.18     | 0.92±0.8     | 0.89±0.21      | 0.89±0.19    |
| Urea (mg/dL)                      | 19.59±4.86    | 18.93±3.29   | 19.09±4.32     | 21.96±18.11  |
| Uric Acid (mg/dL))                | 5.43±1.21     | 5.55±1.33    | 5.24±1.37      | 5.25±1.19    |
| eGFR (mL/min/1.73m <sup>2</sup> ) | 89.05±24.28   | 86.17±20.69  | 95.04±33.41    | 92.72±23.70  |
| Sodium (mmol/L)                   | 139.02±2.83   | 138.14±2.94  | 136.51±14.65   | 138.34±4.16  |
| Potassium (mmol/L)                | 4.80±0.80     | 4.62±0.32    | 4.68±0.35      | 4.57±0.38    |
| Chloride (mmol/L)                 | 100.97±2.98   | 101.31±2.85  | 101.25±2.62    | 101.08±3.50  |

### Supplementary Results

**Supplementary Table 1 : Liver and kidney function tests performed at screening and final visits for active and placebo groups.**

Values are expressed as Mean  $\pm$  SD or median and inter-quartile range based on normal distribution. Independent T-test or Mann-Whitney U test was used to compute the difference between the groups. No significant difference was observed between Screening and final visit in both Calebin A and placebo groups.

| PARAMETER                                        | ACTIVE<br>(N=47) |              | PLACEBO<br>(N=47) |            |
|--------------------------------------------------|------------------|--------------|-------------------|------------|
|                                                  | Day 0            | Day90        | Day 0             | Day90      |
| Hemoglobin (g/dL)                                | 14.23±1.54       | 14.18±1.55   | 13.88±1.85        | 13.80±1.71 |
| RBC (Million/ $\mu$ L)                           | 4.85±0.31        | 4.91±0.56    | 4.88±0.44         | 4.94±0.36  |
| Platelet Count (lakhs/ $\text{mm}^3$ )           | 2.50±0.59        | 2.53±0.55    | 2.72 ±0.54        | 3.10 ±0.66 |
| Packed Cell Volume (%)                           | 44.50±4.87       | 45.19±5.33   | 44.10±5.64        | 44.22±5.17 |
| Mean Cell Volume (fL)                            | 90.34±7.56       | 90.54±7.95   | 88.33±8.77        | 87.56±9.34 |
| Mean Platelet Volume (fL)                        | 9.88±1.70        | 10.19±1.52   | 9.98±1.56         | 9.95±1.61  |
| Mean Corpuscular Hemoglobin (pg)                 | 28.34±2.51       | 28.54±2.26   | 27.49±2.84        | 27.31±2.99 |
| Mean Corpuscular Hemoglobin Concentration (g/dL) | 33.57±1.76       | 33.52±1.85   | 33.21±1.98        | 33.17±2.16 |
| Total Leukocyte Count (cell/ $\text{mm}^3$ )     | 8.82±2.85        | 8.51±2.48    | 9.28±2.56         | 8.92±2.34  |
| Lymphocytes (%)                                  | 28.19±7.24       | 29.65±8.72   | 28.29±8.18        | 28.57±6.24 |
| Eosinophils (%)                                  | 3.72±1.83        | 3.80±3.14    | 3.70±1.91         | 3.91±2.26  |
| Monocytes (%)                                    | 4.06±2.66        | 3.88±2.89    | 4.29±2.85         | 4.36±3.03  |
| Neutrophils (%)                                  | 63.74±8.67       | 61.58±14.13* | 63.42±10.37       | 63.04±8.48 |
| Basophils (%)                                    | 0.25±0.48        | 0.33±0.52    | 0.31±0.69         | 0.38±0.57  |

**Supplementary Table 2: Hematological parameters for active and placebo groups.**

Values are expressed as Mean  $\pm$  SD. No significant difference was observed between Screening and final visit in both Calebin A and placebo groups, except neutrophil% which decreased in Calebin A group. \*P<0.05;

**Supplementary Table 3: Urine analysis for active and placebo groups.**

| PARAMETER            | ACTIVE<br>(N=47)   |              | PLACEBO<br>(N=47)  |              |
|----------------------|--------------------|--------------|--------------------|--------------|
|                      | Screening<br>Visit | Visit 5      | Screening<br>Visit | Visit 5      |
| <b>Colour</b>        |                    |              |                    |              |
| Pale Yellow          | 32 (68.08 %)       | 32 (68.08 %) | 37 (80.43 %)       | 30 (66.67 %) |
| Reddish              | 11 (23.40 %)       | 10 (21.27 %) | 6 (13.04 %)        | 8 (17.78 %)  |
| Yellow               | 4 (8.51 %)         | 5 (10.63 %)  | 3 (6.52 %)         | 7 (15.56 %)  |
| <b>Appearance</b>    |                    |              |                    |              |
| Clear                | 37 (78.72 %)       | 33 (70.21 %) | 35 (74.46 %)       | 34 (75.56 %) |
| Slightly Turbid      | 10 (21.27 %)       | 14 (29.78 %) | 12 (25.53 %)       | 10 (22.22 %) |
| Turbid               |                    | 0 (0.00 %)   |                    | 1 (2.22 %)   |
| <b>Protein</b>       |                    |              |                    |              |
| Present (+)          | 3 (6.38 %)         | 0 (0.00 %)   | 1 (2.17 %)         | 3 (6.81 %)   |
| Negative (-)         | 32 (68.08 %)       | 36 (76.59 %) | 32 (69.56 %)       | 31 (70.45 %) |
| Trace                | 1 (2.12 %)         |              | 3 (6.52 %)         |              |
| Nil                  | 11 (23.40 %)       | 11 (23.40 %) | 10 (21.73 %)       | 10 (22.72 %) |
| <b>Glucose</b>       |                    |              |                    |              |
| Positive             | 3 (6.38 %)         | 1 (2.12 %)   | 0 (0.00 %)         | 0 (0.00 %)   |
| Negative             | 33 (70.21 %)       | 35 (74.46 %) | 37 (78.72 %)       | 35 (77.78 %) |
| Nil                  | 11 (23.40 %)       | 11 (23.40 %) | 10 (21.27 %)       | 10 (22.22 %) |
| <b>Ketone Bodies</b> |                    |              |                    |              |
| Positive             | 0 (0.00 %)         | 2 (4.25 %)   | 1 (2.12 %)         | 1 (2.22 %)   |
| Negative             | 47 (100.00 %)      | 45 (95.74 %) | 46 (97.87 %)       | 44 (97.78 %) |
| <b>Urobilinogen</b>  |                    |              |                    |              |
| Normal               | 36 (76.59 %)       | 23 (48.93 %) | 37 (78.72 %)       | 24 (53.33 %) |
| Negative             | 11 (23.40 %)       | 24 (51.06 %) | 10 (21.27 %)       | 21 (46.67 %) |
| <b>Bilirubin</b>     |                    |              |                    |              |
| Normal               |                    | 1 (2.12 %)   |                    | 1 (2.27 %)   |
| Negative             |                    | 46 (97.87 %) |                    | 43 (97.72 %) |

|                         |              |              |              |              |
|-------------------------|--------------|--------------|--------------|--------------|
| <b>Nitrites</b>         |              |              |              |              |
| Positive                | 5 (10.63 %)  | 7 (14.89 %)  | 4 (8.51 %)   | 5 (11.11 %)  |
| Negative                | 42 (89.36 %) | 40 (85.10 %) | 43 (91.48 %) | 40 (88.89 %) |
| <b>Cast</b>             |              |              |              |              |
| Present                 | 0 (0.00 %)   |              | 1 (2.12 %)   |              |
| Absent                  | 36 (76.59 %) | 36 (76.59 %) | 36 (76.59 %) | 35 (77.78 %) |
| Nil                     | 11 (23.40 %) | 11 (23.40 %) | 10 (21.27 %) | 10 (22.22 %) |
| <b>Crystals</b>         |              |              |              |              |
| Present                 | 4 (8.51 %)   | 3 (6.38 %)   | 4 (8.51 %)   | 4 (8.89 %)   |
| Absent                  | 32 (68.08 %) | 33 (70.21 %) | 33 (70.21 %) | 31 (68.89 %) |
| Nil                     | 11 (23.40 %) | 11 (23.40 %) | 10 (21.27 %) | 10 (22.22 %) |
| <b>Specific Gravity</b> | 1.02±0.006   | 1.01±0.007   | 1.01±0.006   | 1.02±0.007   |
| <b>pH</b>               | 6.23±0.45    | 6.24±0.40    | 6.32±0.57    | 6.30±0.38    |
| <b>Epithelial Cells</b> |              |              |              |              |
| 0 – 1                   | 13 (27.65 %) | 13 (27.65 %) | 12 (25.53 %) | 9 (19.14 %)  |
| 1 – 2                   | 9 (19.14 %)  | 8 (17.02 %)  | 8 (17.02 %)  | 11 (23.40 %) |
| 2 – 3                   | 4 (8.51 %)   | 10 (21.27 %) | 10 (21.27 %) | 8 (17.02 %)  |
| 3 – 4                   | 7 (14.89 %)  | 6 (12.76 %)  | 5 (10.63 %)  | 7 (14.89 %)  |
| 3 – 5                   | 7 (14.89 %)  | 4 (8.0510 %) | 5 (10.63 %)  | 6 (12.76 %)  |
| 4 – 5                   | 1 (2.1200 %) | 3 (6.38 %)   | 2 (4.25 %)   | 1 (2.12 %)   |
| 4 – 6                   | 2 (4.25 %)   | 1 (2.12 %)   | 3 (6.38 %)   | 2 (4.25 %)   |
| 5 – 7                   | 0 (0.00 %)   | 1 (2.12 %)   | 2 (4.25 %)   | 0 (0.00 %)   |
| 6 – 8                   | 2 (4.25 %)   |              | 0 (0.00 %)   |              |
| 8 – 10                  | 2 (4.25 %)   | 0 (0.00 %)   | 0 (0.00 %)   | 1 (2.12 %)   |
| Nil                     |              | 1 (2.12 %)   |              | 17 (36.17 %) |
| <b>RBC</b>              |              |              |              |              |
| 1 – 0                   | 1 (2.12 %)   | 2 (4.25 %)   | 1 (2.12 %)   | 1 (2.22 %)   |
| 1 – 2                   | 0 (0.00 %)   | 2 (4.25 %)   | 1 (2.12 %)   | 2 (4.44 %)   |
| 20 – 30                 | 1 (2.12 %)   | 0 (0.00 %)   | 0 (0.00 %)   | 1 (2.22 %)   |
| 5 – 7                   | 0 (0.00 %)   | 1 (2.12 %)   | 2 (4.25 %)   | 1 (2.22 %)   |
| 8 – 10                  |              | 1 (2.12 %)   |              | 0 (0.00 %)   |
| Not Detected            | 34 (72.34 %) | 30 (63.82 %) | 33 (70.21 %) | 30 (66.67 %) |



|     |              |              |              |              |
|-----|--------------|--------------|--------------|--------------|
| Nil | 11 (23.40 %) | 11 (23.40 %) | 10 (21.27 %) | 10 (22.22 %) |
|-----|--------------|--------------|--------------|--------------|

Values are expressed as N (percentage). No significant difference was observed between Screening and final visit in both Calebin A and placebo groups

1. M. Muhammed, M. Anju, P. Anjali, L. Prachi Subhash and V. \*Kiran Kumar, EFFICACY AND TOLERABILITY OF A NOVEL FORMULATION FOR WEIGHT MANAGEMENT IN OBESE SUBJECTS: A RANDOMIZED, DOUBLE BLIND, PLACEBO CONTROLLED, CLINICAL STUDY, *International Journal of Ayurveda and Pharma Research*, 2016, **4**.
